# Supplementary material
Source: HighWire-hosted journal article supplement (http://bmjopenquality.bmj.com/highwire/filestream/136131/field_highwire_adjunct_files/1/ds3513.pdf)
Supplement: ds3513.pdf [file ds3513.pdf]

# Results – Improving the Quality of Weekend Handover at Yeovil District Hospital

## Results

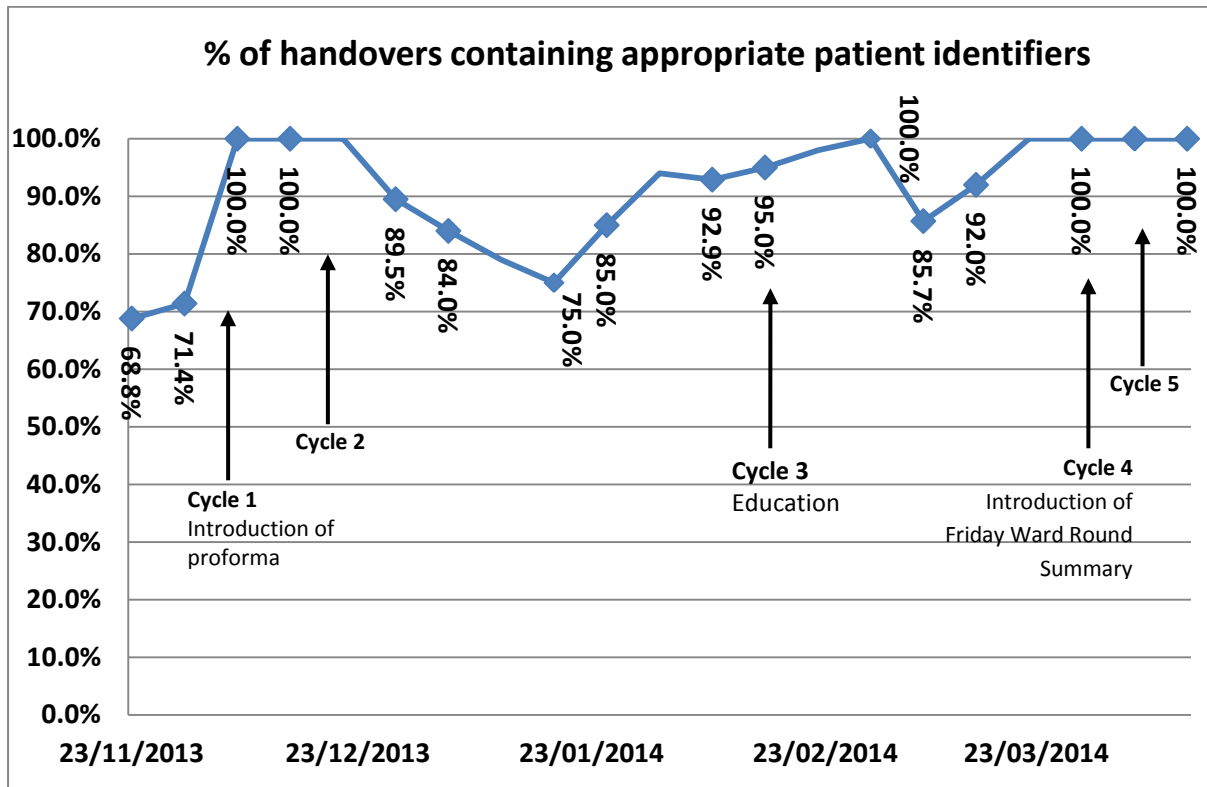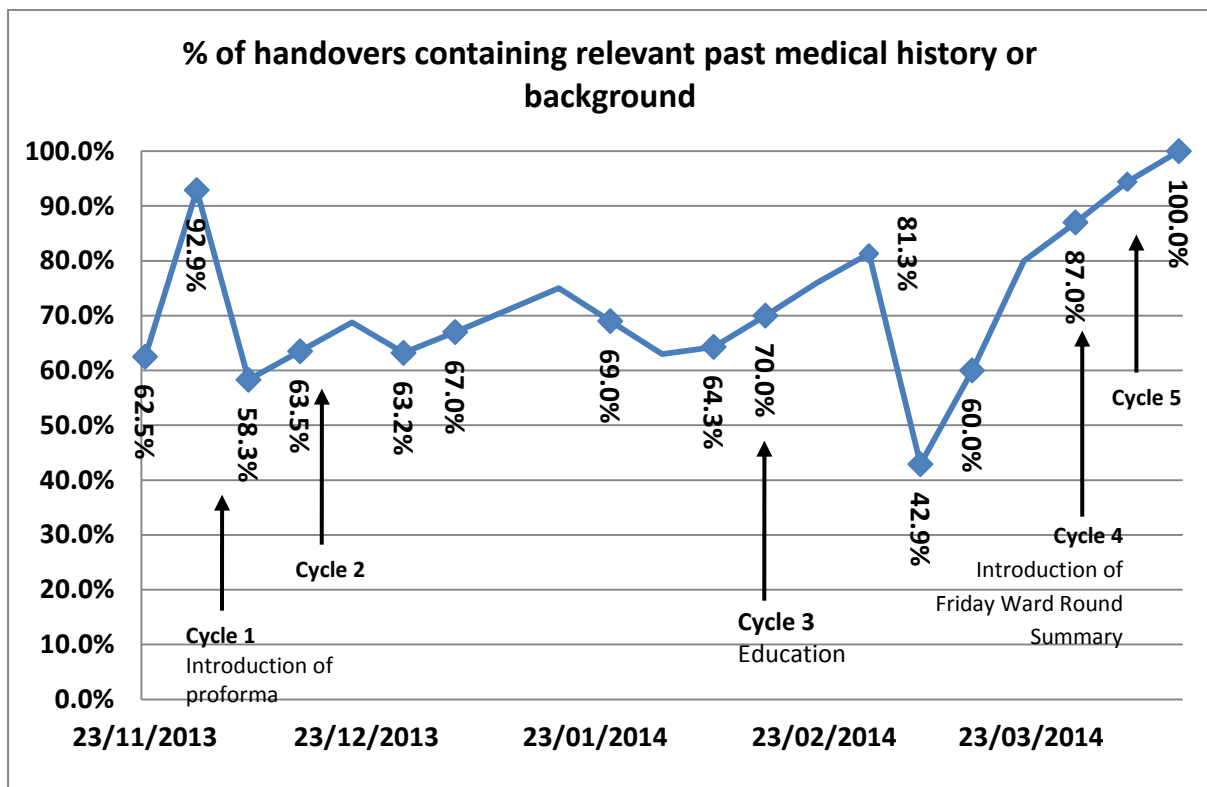

# Results – Improving the Quality of Weekend Handover at Yeovil District Hospital

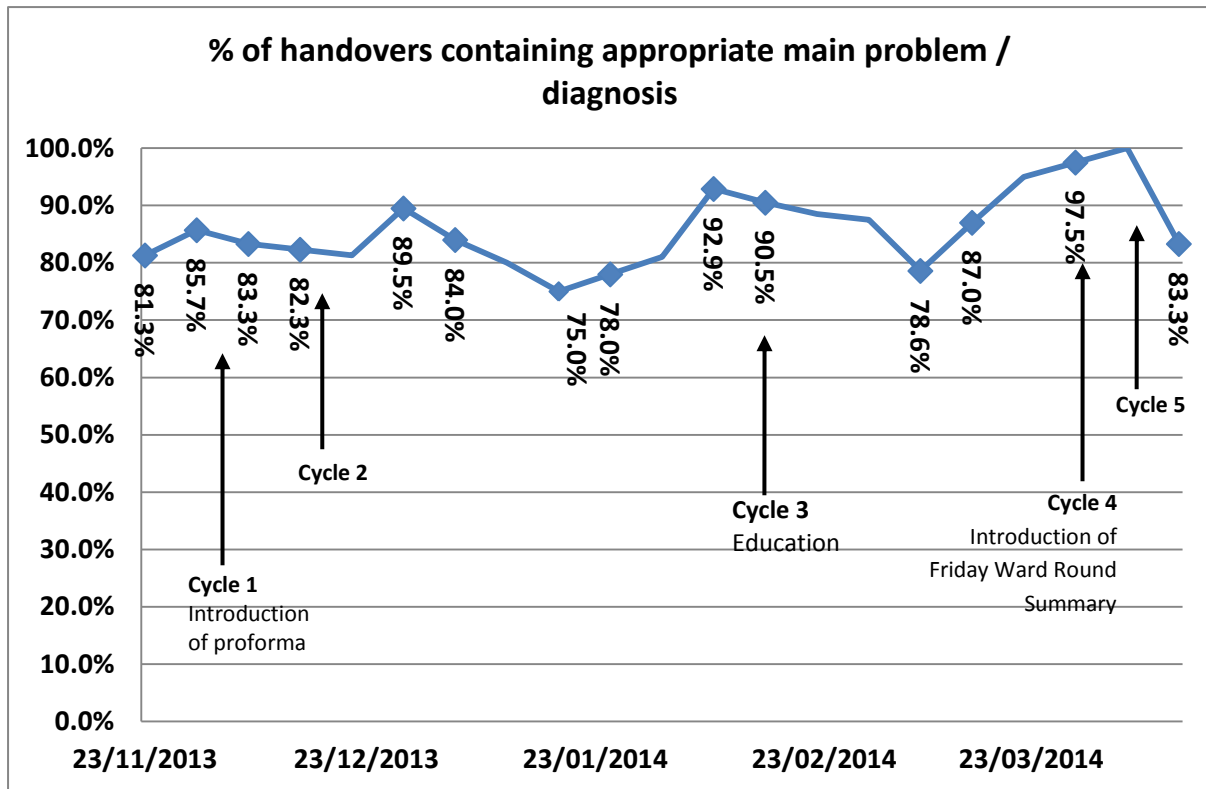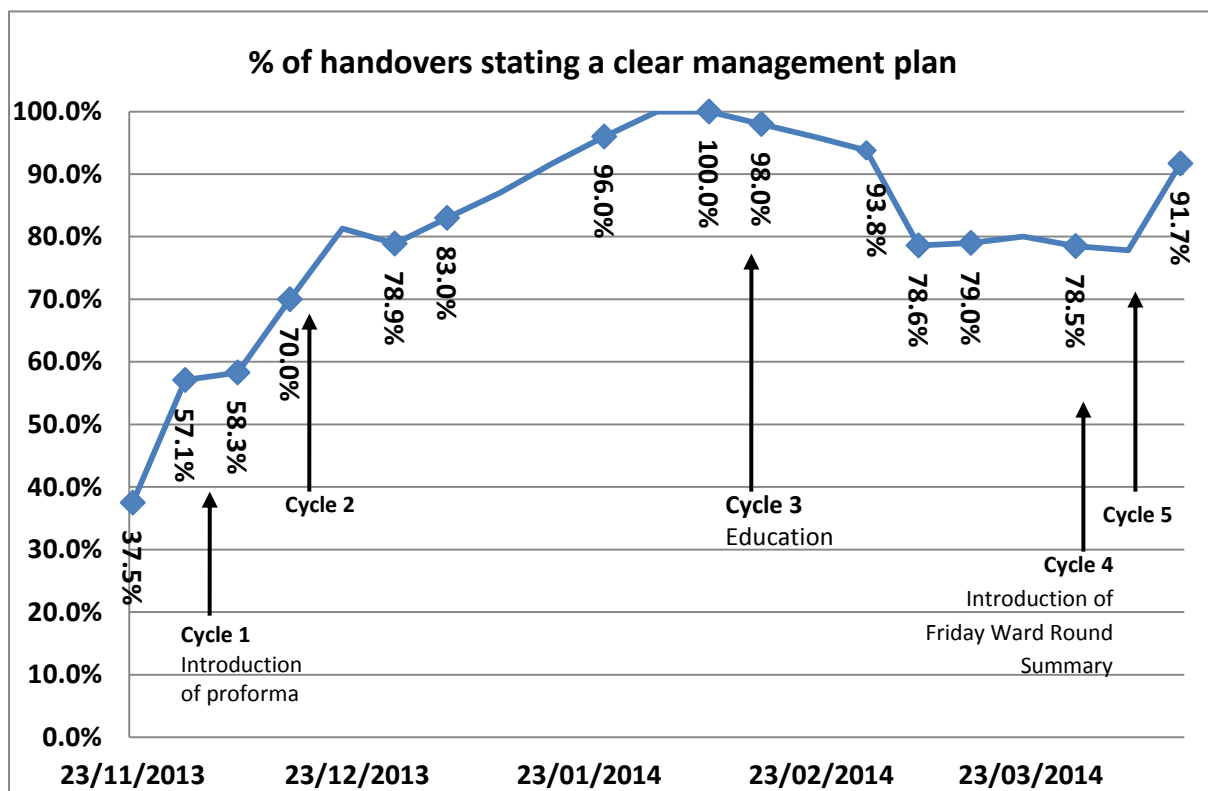

## Results – Improving the Quality of Weekend Handover at Yeovil District Hospital

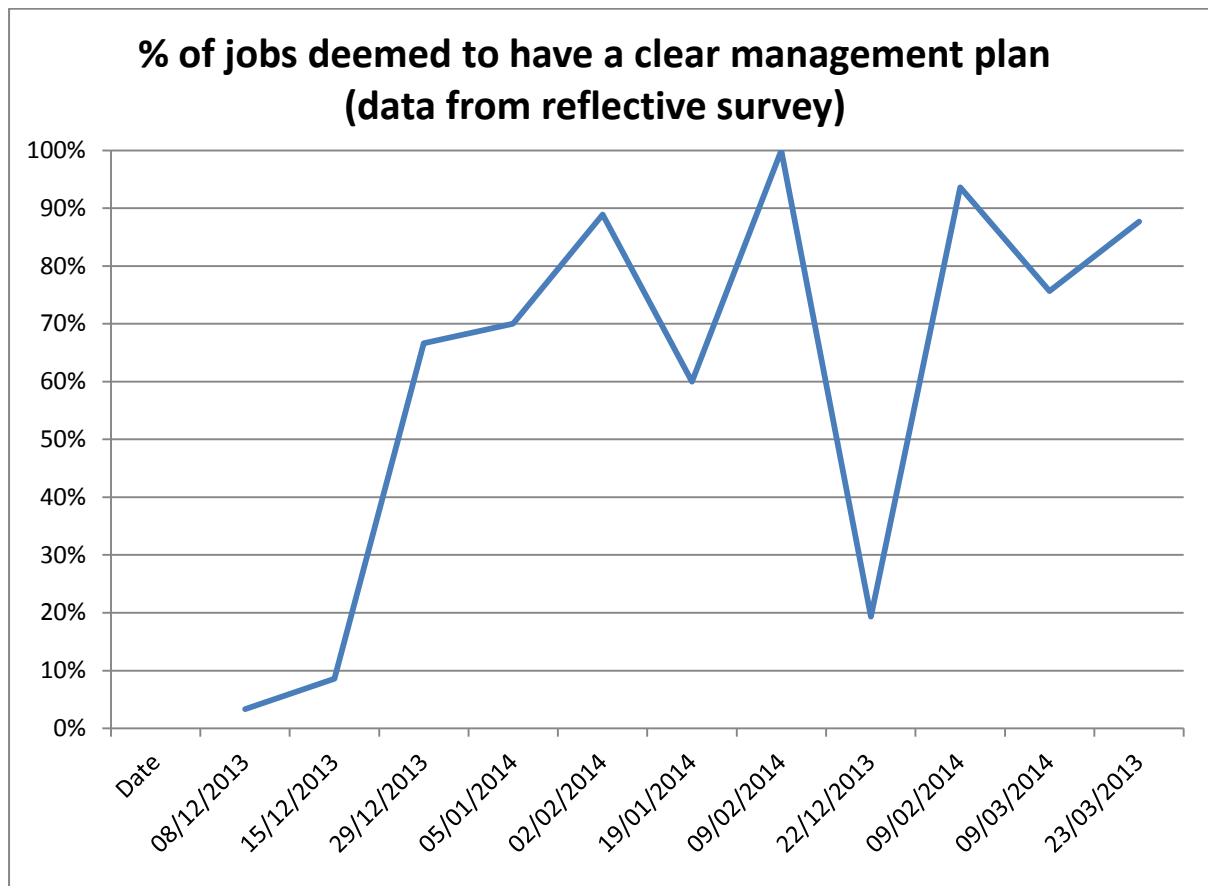

### F1 COMMENTS

Extremely useful to have a standardised handover sheet with clear plans and relevant background information about the patient, especially compared to the blank sheets we used before.

Handover should have name and two identifiers as well as location (ward, bay and bed)

Useful to have a proper handover form and force people to write plans

Recommend typed hand over for clarity's sake

Proforma improvement on blank sheet

The handover sheets did feel easier to use than the ward that didn't use the handover sheet
